# Supplementary material for: Multipotent Genetic Suppression of Retrotransposon-Induced Mutations by Nxf1 through Fine-Tuning of Alternative Splicing
Source: PLoS Genet. 2009 May 15;5(5):e1000484. doi: 10.1371/journal.pgen.1000484 (PMC2674570; doi:10.1371/journal.pgen.1000484)
Supplement: Table S2 — qPCR assays. (0.02 MB XLS) [file pgen.1000484.s002.xls]

## Sheet: Sheet1
Gene	Oligo names	For	Rev	size	notes
Dysf	qDysf_333.for, qDysf_480.rev	ACCCACGGGGGCCTCTCTGG	TCACTGAGCAGGGACCAAGT	148	.for primer spans intron 4, assay spans intron 5.
Opcml	qOpcm1_136.for, qOpcm1_274.rev	GCCACCCTCAGGTGTACCAT	TGTATTGGGTAGGCGTGTTG	139	.for primer spans intron 2.
Prkca	qPrkca_391, qPrkca_509	AAATGTGACACCTGCGACAT	TCAGTGACCTCAGCCTTCAG	119	.for primer spans intron 3, assay spans intron 4.
Mtm1	qMtm1_857.for, qMtm1_1029.rev	TCGCCAACAAGGCAACAGGA	AGACTCCAAACTGGACAACCA	173	.for primer spans intron 9.
Zhx2	zhx2_326.for, zhx2_428.rev	AGCCCCGGCGCAGGTCTCCAT	CCAGGCAGCTTCCTATCAGT	103	.for spans intron 1, .rev spans intron 2.
Afp	qAFP_1236.for, qAFP_1364.ref	AGGACAATCTGGAAGAAGAA	TCGTGTAACCAATAAGGAACAGA	129	.for primer spans intron 9, assay spans intron 10.
Dnajc10	qDnajc_409.for, qDnajc_571.rev	AGAGAATTTGATGCTGCTGTCA	TCCGATCATCACCACAGTTG	162	.for primer spans intron 4, assay spans intron 5.
Atp9a	Atp9a_1546.for, Atp9a_1749.rev	AGCCCGGATGAGGTGGCTCT	ATTTCCCCCGTGGACTCAT	194	.for primer spans intron 14, assay spans intron 15.
Art3	Art3_986.for, Art3_1167.rev	TCCTCGGGGGTCTGAAAACA	ATCCGGCAGGAGAGGATTT	182	.for spans intron 4, assay spans introns 5-8.
Mark3	Mark3_1659.for, Mark3_1846.rev	AAGAAAACAGCGCTATTCCA	ATGGGACAAGCTGGGTGA	188	.for primer spans intron 14.
Usp14	usp_517.for, usp_654.rev	AAAGGTATGCAGGTGCGTTGA	GCAGAAACTGCAGCAGAATAA	138	assay spans intron 6.
Mgrn	Mgrn_intr10.for, Mgrn_intr11.rev	GCCGGCTGCCGTTCCGAGCC	CTGTCAGAACTAGAGTGCTC	129	.for primer spans intron 10, .rev spans intron 11.
Ap3d	Ap3d_intr21.for, Ap3d_intr23.rev	GAAGGACAAGAAGGGTGAGG	GATGATTTCCTTTCTTGGTC	188	.for primer spans intron 21, .rev spans intron 23.
Atcay	Atcay_intr1b.for, Atcay.603rev	CCAGACCGCTCCCAGAAGAC	AGGTGTGTCGAGGAAGTCGT	191	.for primer spans intron 2, assay spans intron 3.
Gapd	gapd_intr4.for, gapd_intr5.rev	AGAAACCTGCCAAGTATGAT	TGTCATACCAGGAAATGAGC	179	.for primer spans intron 5.
Ppig (Cyclophilin G)	cycloph_for, cycloph_intr3.rev	GGGACAGGGAAATCAACTCA	CCTCCTCTTCCATTCCCTTC	116	.rev spans intron 5.
Notes	Primers selected using Primer3 web interface http://frodo.wi.mit.edu/primer3/input.htm.
	Primers for IAP or ETn insertion loci were designed to have one primer span the inserted intron as a selective assay for nonmutant transcripts.
